# Supplementary material for: Mid-infrared spectroscopic assessment of nanotoxicity in Gram-negative vs. Gram-positive bacteria
Source: Royal Society of Chemistry journal article supplement (doi:10.1039/c3an01649h), 2013-10-09
Supplement: c3an01649h.pdf [file c3an01649h.pdf]

### Supplementary Information

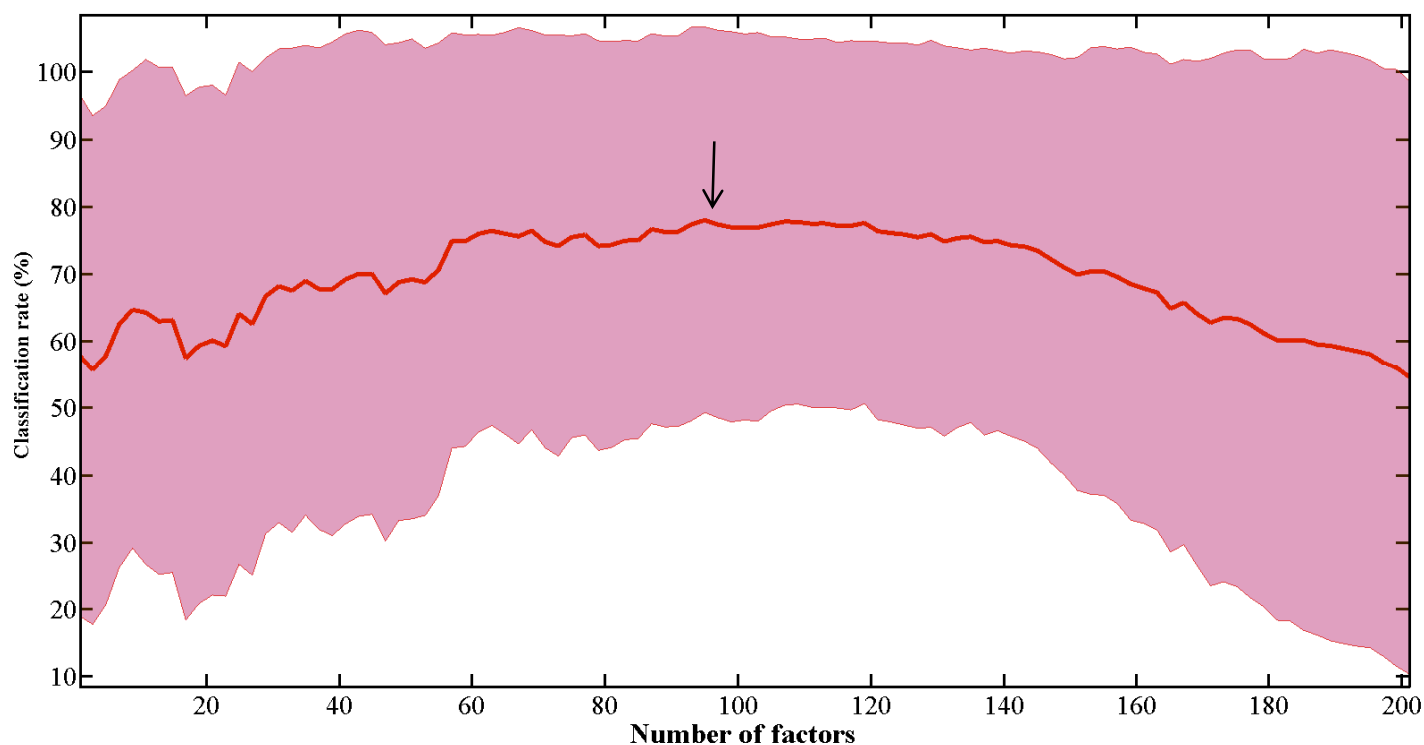

**Figure S1** Example of optimisation of the number of principal component (PCs) for use in cross-validated PCA-LDA. Arrow indicates the highest classification rate possible, which gives us the optimum number of PCs.

**Table S1** Optimal number of principal component (PCs) used for each dataset.

| Dataset                                     | Optimal no. of PCs |
|---------------------------------------------|--------------------|
| <i>P. fluorescens</i>                       | 95                 |
| <i>M. vanbaalenii</i>                       | 75                 |
| <i>P. fluorescens</i> UV-A positive control | 10                 |
| <i>M. vanbaalenii</i> UV-A positive control | 15                 |

**Table S2** Tentative wavenumber assignments for the top five peaks (in order of magnitude) from the cluster vector for *P. fluorescens* treated with 0.01 mg.L<sup>-1</sup> CBN as assessed by SR-FTIR spectroscopy.

| Short MWCNTs                   |                                             |
|--------------------------------|---------------------------------------------|
| Wavenumber (cm <sup>-1</sup> ) | Assignment                                  |
| 1608                           | Adenine vibration of DNA                    |
| 1411                           | COO- stretching and C-H bending of proteins |
| 1149                           | C-O stretching of carbohydrate              |
| 1500                           | Amide II                                    |
| 1740                           | C=O stretching of lipids                    |

| C <sub>60</sub> Fullerene      |                                |
|--------------------------------|--------------------------------|
| Wavenumber (cm <sup>-1</sup> ) | Assignment                     |
| 1149                           | C-O stretching of carbohydrate |
| 1612                           | Amide I                        |
| 1497                           | Amide II                       |
| 1412                           | Proteins                       |
| 1739                           | C=O stretching of lipids       |

| Long MWCNTs                    |                                             |
|--------------------------------|---------------------------------------------|
| Wavenumber (cm <sup>-1</sup> ) | Assignment                                  |
| 1485                           | Proteins                                    |
| 1411                           | COO- stretching and C-H bending of proteins |
| 1608                           | Adenine vibration of DNA                    |
| 1686                           | Amide I                                     |
| 1651                           | Amide I                                     |

| Fullerene soot                 |                                |
|--------------------------------|--------------------------------|
| Wavenumber (cm <sup>-1</sup> ) | Assignment                     |
| 1612                           | Amide I                        |
| 1651                           | Amide I                        |
| 1497                           | Amide II                       |
| 1412                           | Proteins                       |
| 1149                           | C-O stretching of carbohydrate |

**Table S3** Tentative wavenumber assignments for the top five peaks (in order of magnitude) from the cluster vector for *P. fluorescens* treated with 0.01 mg.L<sup>-1</sup> CBN as assessed by ATR-FTIR spectroscopy.

| Short MWCNTs                   |                       |
|--------------------------------|-----------------------|
| Wavenumber (cm <sup>-1</sup> ) | Assignment            |
| 1065                           | C-O stretching of DNA |
| 1084                           | $\nu_s\text{PO}_2^-$  |
| 1666                           | Amide I               |
| 1516                           | Amide II              |
| 1794                           | Lipid                 |

| C <sub>60</sub> Fullerene      |                                     |
|--------------------------------|-------------------------------------|
| Wavenumber (cm <sup>-1</sup> ) | Assignment                          |
| 1447                           | CH <sub>3</sub> bending of proteins |
| 1639                           | Amide I                             |
| 1501                           | Amide II                            |
| 1574                           | Amide II                            |
| 1115                           | Carbohydrate                        |

| Long MWCNTs                    |                                |
|--------------------------------|--------------------------------|
| Wavenumber (cm <sup>-1</sup> ) | Assignment                     |
| 1080                           | $\nu_s\text{PO}_2^-$           |
| 1782                           | Lipid                          |
| 1142                           | C-O stretching of carbohydrate |
| 1516                           | Amide II                       |
| 1501                           | Amide II                       |

| Fullerene soot                 |                         |
|--------------------------------|-------------------------|
| Wavenumber (cm <sup>-1</sup> ) | Assignment              |
| 1084                           | $\nu_s\text{PO}_2^-$    |
| 1072                           | C-O vibration of DNA    |
| 1516                           | Amide II                |
| 1782                           | Lipid                   |
| 1219                           | $\nu_{as}\text{PO}_2^-$ |

**Table S4** Tentative wavenumber assignments for the top five peaks (in order of magnitude) from the cluster vector for *M. vanbaalenii* treated with 0.01 mg.L<sup>-1</sup> CBN as assessed by SR-FTIR spectroscopy.

| Short MWCNTs                   |                          |
|--------------------------------|--------------------------|
| Wavenumber (cm <sup>-1</sup> ) | Assignment               |
| 1581                           | Amide II                 |
| 1743                           | C=O stretching of lipids |
| 1616                           | Amide I                  |
| 1157                           | Carbohydrate             |
| 1477                           | Protein                  |

| C <sub>60</sub> Fullerene      |                          |
|--------------------------------|--------------------------|
| Wavenumber (cm <sup>-1</sup> ) | Assignment               |
| 1585                           | Amide I                  |
| 1619                           | Amide I                  |
| 1742                           | C=O stretching of lipids |
| 1793                           | C=O stretching of lipids |
| 1481                           | Proteins                 |

| Long MWCNTs                    |                          |
|--------------------------------|--------------------------|
| Wavenumber (cm <sup>-1</sup> ) | Assignment               |
| 1585                           | Amide I                  |
| 1619                           | Amide I                  |
| 1743                           | C=O stretching of lipids |
| 984                            | Protein phosphorylation  |
| 1477                           | Proteins                 |

| Fullerene soot                 |                         |
|--------------------------------|-------------------------|
| Wavenumber (cm <sup>-1</sup> ) | Assignment              |
| 1161                           | Carbohydrate            |
| 1565                           | Amide II                |
| 914                            | Protein phosphorylation |
| 1199                           | $\nu_{as}PO_2^-$        |
| 1612                           | Amide I                 |

**Table S5** Tentative wavenumber assignments for the top five peaks (in order of magnitude) from the cluster vector for *M. vanbaalenii* treated with 0.01 mg.L<sup>-1</sup> CBN as assessed by ATR-FTIR spectroscopy.

| Short MWCNTs                   |                       |
|--------------------------------|-----------------------|
| Wavenumber (cm <sup>-1</sup> ) | Assignment            |
| 1003                           | Carbohydrate          |
| 1420                           | Proteins              |
| 1435                           | Proteins              |
| 1060                           | C-O stretching of DNA |
| 937                            | DNA                   |

| C <sub>60</sub> Fullerene      |                                                |
|--------------------------------|------------------------------------------------|
| Wavenumber (cm <sup>-1</sup> ) | Assignment                                     |
| 1385                           | COO- stretching                                |
| 1018                           | CO vibration of polysaccharides                |
| 1003                           | Carbohydrate                                   |
| 1234                           | $\nu_{as}PO_2^-$                               |
| 1053                           | C-O stretching and C-O bending of carbohydrate |

| Long MWCNTs                    |                                |
|--------------------------------|--------------------------------|
| Wavenumber (cm <sup>-1</sup> ) | Assignment                     |
| 1555                           | Amide II                       |
| 1504                           | Amide II                       |
| 1130                           | C-O stretching of carbohydrate |
| 934                            | DNA                            |
| 1466                           | Amide II                       |

| Fullerene soot                 |                                 |
|--------------------------------|---------------------------------|
| Wavenumber (cm <sup>-1</sup> ) | Assignment                      |
| 1003                           | Carbohydrate                    |
| 1720                           | C=O stretching of lipid         |
| 1558                           | Amide II                        |
| 1015                           | CO vibration of polysaccharides |
| 1466                           | Amide II                        |
